# Supplementary material for: The Dynamics of T-Cell Receptor Repertoire Diversity Following Thymus Transplantation for DiGeorge Anomaly
Source: PLoS Comput Biol. 2009 Jun 12;5(6):e1000396. doi: 10.1371/journal.pcbi.1000396 (PMC2690399; doi:10.1371/journal.pcbi.1000396)
Supplement: Text S1 — Supporting Information (0.06 MB PDF) [file pcbi.1000396.s001.pdf]

# The dynamics of T-cell receptor repertoire diversity following thymus transplantation for DiGeorge Anomaly- Text S1

Stanca M. Ciupe<sup>\*</sup>, Blythe H. Devlin<sup>†</sup>, M. Louise Markert<sup>†,‡</sup>, Thomas B. Kepler<sup>\*,‡</sup>

Because the number of lineages is large and because we study the long-term average behavior of  $x_i$  we can replace the stochastic terms by their expectation per unit time to study the average or steady-state behavior. At steady-state, all clones have the same size. Indeed, if we consider that thymic emigration has attained its maximal value  $\epsilon_M = \epsilon/\tau^n$ , we can derive the steady state solution for a family  $x_i$  to be

$$\bar{x}_i = \frac{\gamma - \frac{\gamma(1-\rho)}{\kappa}\bar{T} + \sqrt{(\gamma - \frac{\gamma(1-\rho)}{\kappa}\bar{T})^2 + 4\epsilon_M \frac{n\gamma\rho}{\kappa}}}{2\frac{n\gamma\rho}{\kappa}}, \quad (1)$$

which is independent of specificities  $i$ . Therefore at equilibrium all clone sizes are identical and equal to  $\bar{x}_i = \bar{T}/n$ . The total number of T cells satisfies the equation

$$n\epsilon_M + \gamma\bar{T} - \frac{\gamma}{\kappa}\bar{T}^2 = 0. \quad (2)$$

Moreover, if the thymic contribution to the peripheral pool is negligible at steady state,  $\epsilon_M \ll \gamma\bar{T}$ , the total number of T cells at equilibrium is

$$\bar{T} = \kappa. \quad (3)$$

We can show that the steady state  $(\bar{T}/n, \bar{T}/n, \dots, \bar{T}/n)$  is asymptotically stable. We linearize Eqs.(1,4) about the steady state (1) to get

$$A = \begin{pmatrix} \gamma - \gamma \frac{(2n-1)\rho+1}{\kappa} \bar{x}_1 - \frac{\gamma(1-\rho)}{\kappa} \bar{T} & -\frac{\gamma(1-\rho)}{\kappa} \bar{x}_2 & \dots & -\frac{\gamma(1-\rho)}{\kappa} \bar{x}_n \\ -\frac{\gamma(1-\rho)}{\kappa} \bar{x}_1 & \gamma - \gamma \frac{(2n-1)\rho+1}{\kappa} \bar{x}_2 - \frac{\gamma(1-\rho)}{\kappa} \bar{T} & \dots & -\frac{\gamma(1-\rho)}{\kappa} \bar{x}_n \\ \dots & \dots & \dots & \dots \\ -\frac{\gamma(1-\rho)}{\kappa} \bar{x}_1 & -\frac{\gamma(1-\rho)}{\kappa} \bar{x}_2 & \dots & \gamma - \gamma \frac{(2n-1)\rho+1}{\kappa} \bar{x}_n - \frac{\gamma(1-\rho)}{\kappa} \bar{T} \end{pmatrix} \\ = \begin{pmatrix} \gamma - \gamma \frac{(2n-1)\rho+1}{\kappa} \frac{\bar{T}}{n} - \frac{\gamma(1-\rho)}{\kappa} \bar{T} & -\frac{\gamma(1-\rho)}{\kappa} \frac{\bar{T}}{n} & \dots & -\frac{\gamma(1-\rho)}{\kappa} \frac{\bar{T}}{n} \\ -\frac{\gamma(1-\rho)}{\kappa} \frac{\bar{T}}{n} & \gamma - \gamma \frac{(2n-1)\rho+1}{\kappa} \frac{\bar{T}}{n} - \frac{\gamma(1-\rho)}{\kappa} \bar{T} & \dots & -\frac{\gamma(1-\rho)}{\kappa} \frac{\bar{T}}{n} \\ \dots & \dots & \dots & \dots \\ -\frac{\gamma(1-\rho)}{\kappa} \frac{\bar{T}}{n} & -\frac{\gamma(1-\rho)}{\kappa} \frac{\bar{T}}{n} & \dots & \gamma - \gamma \frac{(2n-1)\rho+1}{\kappa} \frac{\bar{T}}{n} - \frac{\gamma(1-\rho)}{\kappa} \bar{T} \end{pmatrix}. \quad (4)$$

The characteristic equation for the linearized system is

$$(\gamma - \frac{2\gamma}{\kappa}\bar{T} - \Lambda)(\gamma - \frac{\gamma(1+\rho)}{\kappa}\bar{T} - \Lambda)^{n-1} = 0. \quad (5)$$

From equation (2) we have that  $\gamma - \frac{\gamma}{\kappa}\bar{T} = -n\epsilon_M/\bar{T}$ . We can conclude that all eigenvalues of (5),

$$\Lambda_1 = -\frac{\gamma}{\kappa}\bar{T} - \frac{n\epsilon_M}{\bar{T}}, \\ \Lambda_{2,3,\dots,n} = -\frac{\gamma\rho}{\kappa}\bar{T} - \frac{n\epsilon_M}{\bar{T}}, \quad (6)$$

are negative, therefore the steady state  $(\bar{T}/n, \bar{T}/n, \dots, \bar{T}/n)$  is asymptotically stable.
